# Supplementary material
Source: MDPI journal article supplement (https://www.mdpi.com/2073-4441/9/7/501)
Supplement: s1 [file s1]

## Supplementary data

**Table S1.** Saturated and unsaturated infiltration rates and time to initial drainage for the soil mixes (across compost treatments) for pre-plant and post-harvest.

| Soil mix | Pre plant Sat rate | Pre plant Unsat rate | Drain time | Post harvest Sat rate | Post harvest Unsat rate | Drain time |
|----------|--------------------|----------------------|------------|-----------------------|-------------------------|------------|
|          | cm/h               | cm/h                 | min        | cm/h                  | cm/h                    | min        |
| Storden  | 3.1a               | 2.1a                 | 87a        | 5.3a                  | 5.6a                    | 17a        |
| Sac      | 1.5a               | 2.1a                 | 71a        | 4.1a                  | 4.4a                    | 27a        |
| Killduff | 2.8a               | 3.9a                 | 67a        | 4.2a                  | 4.9a                    | 20a        |
| Harps    | 1.7a               | 5.4a                 | 49a        | 4.5a                  | 5.1a                    | 23a        |

Treatments followed by the same letter in a column were not significantly different at  $p = 0.05$ .

**Table S2.** Saturated and unsaturated infiltration rates and time to initial drainage for the compost treatments (across soils) for pre-plant and post-harvest.

| Compost blanket | Pre plant Sat rate | Pre plant Unsat rate | Drain time | Post harvest Sat rate | Post harvest Unsat rate | Drain time |
|-----------------|--------------------|----------------------|------------|-----------------------|-------------------------|------------|
|                 | cm/h               | cm/h                 | min        | cm/h                  | cm/h                    | min        |
| No              | 2.8a               | 5.5a                 | 52b        | 4.8a                  | 5.5a                    | 20a        |
| Yes             | 1.8a               | 1.2b                 | 95a        | 4.2a                  | 4.5a                    | 24a        |

Treatments followed by the same letter in a column were not significantly different at  $p = 0.05$ .

**Table S3.** Mass of grass and clover, surface bulk density, and root depth for the soil mixes averaged across those with and without compost blankets.

| Soil mix | Grass | Clover | Bulk density       | Root depth |
|----------|-------|--------|--------------------|------------|
|          | g     | g      | Mg m <sup>-3</sup> | m          |
| Storden  | 1.3a  | 7.2a   | 1.68a              | 0.26a      |
| Sac      | 0.9a  | 7.8a   | 1.64a              | 0.28a      |
| Killduff | 1.0a  | 7.4a   | 1.65a              | 0.27a      |
| Harps    | 1.0a  | 7.3a   | 1.66a              | 0.28a      |

Treatments followed by the same letter in a column were not significantly different at  $p = 0.05$ .

**Table S4.** Nitrate in saturated and unsaturated effluent of compost blanket treatment (across soils), before planting and after harvest. Also calculated total phosphorus load in preplant and post-harvest effluent, based on outflow volumes for saturated and unsaturated effluent.

| Compost blanket | Pre NO <sub>3</sub> sat | Pre NO <sub>3</sub> unsat | Pre NO <sub>3</sub> load | Post NO <sub>3</sub> sat | Post NO <sub>3</sub> unsat | Post NO <sub>3</sub> load |
|-----------------|-------------------------|---------------------------|--------------------------|--------------------------|----------------------------|---------------------------|
|                 | mg/L                    | mg/L                      | mg                       | mg/L                     | mg/L                       | mg                        |
| No              | 56a                     | 34a                       | 59a                      | 192a                     | 86a                        | 214a                      |
| Yes             | 39a                     | 26a                       | 36a                      | 187a                     | 59b                        | 207a                      |

**Table S5.** Total phosphorus in saturated and unsaturated effluent of compost blanket treatment (across soils), before planting and after harvest. Also calculated total phosphorus load in preplant and post-harvest effluent, based on outflow volumes for saturated and unsaturated effluent.

| Compost blanket | Pre plant TPsat | Pre plant TPunsat | Pre plant P load | Post harvest TPsat | Post harvest TPunsat | Post harvest P load |
|-----------------|-----------------|-------------------|------------------|--------------------|----------------------|---------------------|
|                 | mg/L            | mg/L              | mg               | mg/L               | mg/L                 | mg                  |
| No              | 0.17a           | 0.34a             | 0.35a            | 0.16a              | 0.15a                | 0.22a               |
| Yes             | 0.10a           | 0.32a             | 0.21a            | 0.17a              | 0.13a                | 0.22a               |
